# Supplementary material for: Social Support and Attachment to Pets Moderate the Association between Sexual and Gender Minority Status and the Likelihood of Delaying or Avoiding COVID-19 Testing
Source: MDPI journal article supplement (doi:10.3390/socsci10080301), 2021-08-10
Supplement: s1 [file s1]

**Table S1.** Relations Between Covariates and Outcomes in Moderation Models (*n* = 1453)

| Covariate                           | Moderation Model             | Likelihood of Delaying<br>or Avoiding COVID-19<br>Testing |       |          | Likelihood of Delaying<br>or Avoiding COVID-19<br>Treatment |       |          |
|-------------------------------------|------------------------------|-----------------------------------------------------------|-------|----------|-------------------------------------------------------------|-------|----------|
|                                     |                              | $\beta$                                                   | Z     | <i>p</i> | $\beta$                                                     | Z     | <i>p</i> |
| Relationship<br>Status <sup>a</sup> | Simple Moderation            | -0.68                                                     | -3.01 | 0.003    | -0.49                                                       | -2.49 | 0.01     |
|                                     | Additive Multiple Moderation | -0.68                                                     | -3.01 | 0.003    | -0.48                                                       | -2.44 | 0.01     |
| Has Child(ren) <sup>b</sup>         | Simple Moderation            | -0.85                                                     | -1.92 | 0.06     | -1.12                                                       | -2.76 | 0.01     |
|                                     | Additive Multiple Moderation | -0.85                                                     | -1.92 | 0.06     | -1.12                                                       | -2.76 | 0.01     |
| Education Level <sup>c</sup>        | Simple Moderation            | 0.53                                                      | 1.69  | 0.09     | 0.23                                                        | 0.90  | 0.37     |
|                                     | Additive Multiple Moderation | 0.53                                                      | 1.68  | 0.09     | 0.22                                                        | 0.87  | 0.39     |
| Race/Ethnicity <sup>d</sup>         | Simple Moderation            | 0.66                                                      | 1.70  | 0.09     | 0.60                                                        | 1.83  | 0.07     |
|                                     | Additive Multiple Moderation | 0.66                                                      | 1.70  | 0.09     | 0.60                                                        | 1.84  | 0.07     |
| Has<br>Roommate(s) <sup>e</sup>     | Simple Moderation            | 0.09                                                      | 0.34  | 0.74     | 0.03                                                        | 0.14  | 0.88     |
|                                     | Additive Multiple Moderation | 0.09                                                      | 0.34  | 0.74     | 0.03                                                        | 0.13  | 0.89     |
| Employment<br>Risk <sup>f</sup>     | Simple Moderation            | 0.45                                                      | 1.53  | 0.12     | -0.02                                                       | -0.09 | 0.93     |
|                                     | Additive Multiple Moderation | 0.45                                                      | 1.54  | 0.12     | -0.02                                                       | -0.06 | 0.95     |
| Age                                 | Simple Moderation            | 0.06                                                      | 0.52  | 0.60     | 0.09                                                        | 0.91  | 0.36     |
|                                     | Additive Multiple Moderation | 0.06                                                      | 0.52  | 0.60     | 0.09                                                        | 0.92  | 0.36     |
| Income Worry <sup>g</sup>           | Simple Moderation            | 0.30                                                      | 1.19  | 0.23     | 0.46                                                        | 2.10  | 0.04     |
|                                     | Additive Multiple Moderation | 0.30                                                      | 1.19  | 0.23     | 0.47                                                        | 2.12  | 0.04     |
| Health Insurance<br><sup>h</sup>    | Simple Moderation            | -0.11                                                     | -0.22 | 0.83     | -0.39                                                       | -0.91 | 0.36     |
|                                     | Additive Multiple Moderation | -0.11                                                     | -0.22 | 0.83     | -0.41                                                       | -0.95 | 0.34     |

<sup>a</sup> 0 = not in a relationship, 1 = in a relationship. <sup>b</sup> 0 = does not have children, 1 = has children. <sup>c</sup> 0 = no college degree, 1 = some college or higher. <sup>d</sup> 0 = non-White racial identity and/or Latinx ethnicity, 1 = White/White ethnic, non-Latinx. <sup>e</sup> 0 = no roommate, 1 = has roommate. <sup>f</sup> 0 = no change; 1 = working from home, laid off/fired, or started a new job. <sup>g</sup> 0 = no worry about income, 1 = is worried about income. <sup>h</sup> 0 = no health insurance, 1 = has health insurance.
